# Supplementary material
Source: PubMed Central journal article supplement (PMC5679101)

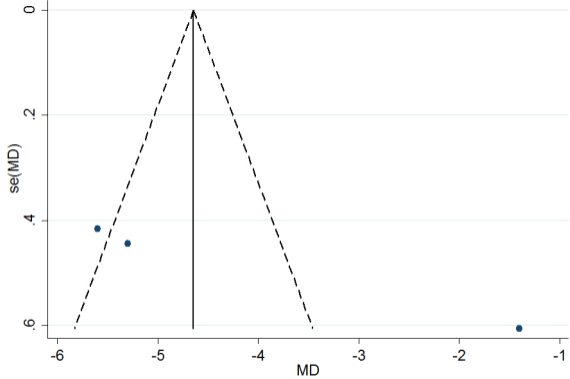

Supplement: NIHMS883219-supplement-SDC_1.pdf [file NIHMS883219-supplement-SDC_1.pdf]

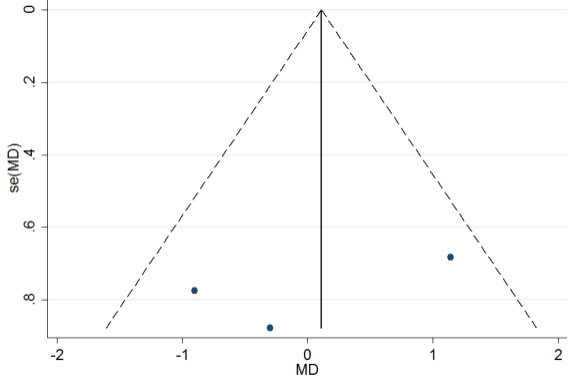

Supplement: NIHMS883219-supplement-SDC_2.pdf [file NIHMS883219-supplement-SDC_2.pdf]
